# Supplementary material
Source: HighWire-hosted journal article supplement (https://informatics.bmj.com/content/27/1/e100046)
Supplement: inline-supplementary-material-2 [file inline-supplementary-material-2.xlsx]

## Sheet: Sheet1
Literacy calculation
	Actual job (if known via interview)	Employment status	Education Level	Years having the condition	Years using the PHR	Other PHRs used before	PHR suggested by	Share data with healthcare provider	Participant actually states the fact that knows a lot about their condition	Participant actually states the fact that knows a lot about IT	If they customise the PHR	If they use more than 1 PHR	If they use more than 1 PHR and connect them	Their reaction if they could see their lab tests	Use of Social media, gamification features	If they do not need information regarding their medication or condition because they believe they already know enough	If they adhere to their guidelines
Health Literacy	if it is health related => high	If working => higher inference	The higher the education level the higher inferences	The longer then the higher inferences					If yes => high					If they state that they know enough, so they will not be scared => high; if they state that they will call GP and be terrified => medium or low; if they say they will not use this because they don't know enough => low; if they say that they would like an explanation or suggestion next to the results => at least medium		If yes => high	If yes => at least medium
Digital Literacy	if it is IT related => high	if worker or not employeed => low inference; anything else => higher inference	The higher the education level the higher inferences		The longer then the higher inferences	The longer then the higher inferences	If suggested by family or friends or nobody then is at least medium	If yes then at least medium		If yes => high	If yes => at least medium	If yes => at least medium	if yes => high		If yes => at least medium
